# Supplementary material for: Control of the crystal habit and magnetic properties of Co nanoparticles through the stirring rate
Source: Royal Society of Chemistry journal article supplement (doi:10.1039/c7ce00714k), 2017-01-01
Supplement: c7ce00714k1.pdf [file c7ce00714k1.pdf]

## Control of the crystal habit and magnetic properties of Co nanoparticles through the stirring rate.

By

K. Mrad, F. Schoenstein, H. T. T. Nong, E. Anagnostopoulou, A. Viola, L. Mouton, S. Mercone,  
C. Ricolleau, N. Jouini, M. Abderraba, L.-M. Lacroix, G. Viau, J.-Y. Piquemal

### Supplementary material

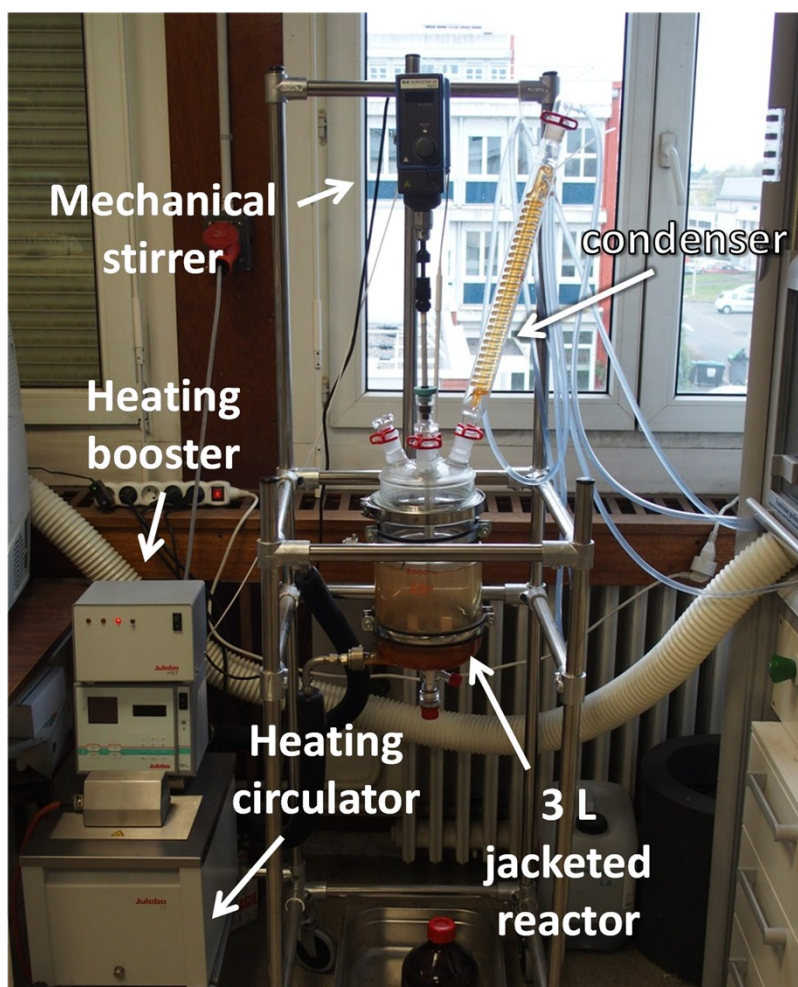

**Figure S1.** Photography of the experimental set-up for the large-scale production of Co NRs.

The jacketed reactor's heating system consists in a double glass cylindrical flask with oil circulation. The internal diameter is 15 cm. A heating circulator Julabo SL-12 equipped with a Julabo HST booster heater (6 kW), was used to heat the oil. The additional heater allowed reaching a ramping temperature close to  $8^{\circ}\text{C}\cdot\text{min}^{-1}$ . A Teflon propeller was used for the mechanical stirring of the reacting medium.
